# Supplementary material for: Anti-Shigellosis Activity and Mechanisms of Action of Extracts from Diospyros gilletii Stem Bark
Source: MDPI journal article supplement (doi:10.3390/ddc3010015), 2024-03-01
Supplement: s1 [file s1]

# Anti-shigellosis activity and mechanisms of action of extracts from *Diospyros gillettii* stem bark.

Audrey Carrel Nguelo Talla<sup>1</sup>, Eugénie Aimée Madiesse Kemgne<sup>1</sup>, Vincent Ngouana<sup>2</sup>, Bijou-Lafortune Noumboue Kouamou<sup>1</sup>, Listone Monelle Nzeye Ngameni<sup>1</sup>, Brice Rostan Pinlap<sup>1</sup>, Yanick Kevin Dongmo Melogmo<sup>1</sup>, Branly-Natalien Nguena-Dongue<sup>1</sup>, Boniface Pone Kamdem<sup>1,3\*</sup>, Paul Keilah Lunga<sup>1\*</sup>, Fabrice Fekam Boyom<sup>1</sup>

<sup>1</sup> Antimicrobial and Biocontrol Agents Unit (AmBcAU), Laboratory for Phytobiochemistry and Medicinal Plants Studies, Department of Biochemistry, Faculty of Science, University of Yaounde I, Yaounde P.O. Box 812, Cameroon; **Email:** [audreycarrelnguelotalla@gmail.com](mailto:audreycarrelnguelotalla@gmail.com) (A.C.N.T.); [eugboyom@yahoo.fr](mailto:eugboyom@yahoo.fr) (E.A.M.K.); [noumbouebijoulafortune@gmail.com](mailto:noumbouebijoulafortune@gmail.com) (B.-L.M.K.); [nzeyemonelle@gmail.com](mailto:nzeyemonelle@gmail.com) (L.M.N.N.); [rostand.pinlap@gmail.com](mailto:rostand.pinlap@gmail.com) (B.R.P.); [melogmoyanick@yahoo.fr](mailto:melogmoyanick@yahoo.fr) (Y.K.D.M.); [nguenadonguebranlynatalien@gmail.com](mailto:nguenadonguebranlynatalien@gmail.com) (B.-N.N.-D.); [ponekamdemboniface@gmail.com](mailto:ponekamdemboniface@gmail.com) (B.P.K.); [lungapaul@yahoo.ca](mailto:lungapaul@yahoo.ca) (P.K.L.); [fabrice.boyom@fulbrightmail.org](mailto:fabrice.boyom@fulbrightmail.org) (F.F.B.);

<sup>2</sup> Department of Pharmacy, Faculty of Medicine and Pharmaceutical Sciences, University of Dschang, P.O. Box 96, Dschang-Cameroon; **Email:** [ngouanavincent@yahoo.fr](mailto:ngouanavincent@yahoo.fr) (V.N.);

<sup>3</sup> Higher Institute of Agriculture, Forestry, Water and Environment (HIAFWE), University of Ebolowa, P.O. Box 755, Ebolowa-Cameroon; **Email:** [ponekamdemboniface@gmail.com](mailto:ponekamdemboniface@gmail.com) (B.P.K.).

\*Correspondence: [lungapaul@yahoo.ca](mailto:lungapaul@yahoo.ca) (P.K.L.); Tel.: (+237) 672 46 01 30; [ponekamdemboniface@gmail.com](mailto:ponekamdemboniface@gmail.com) (B.P.K.); Tel.: (+237) 680 98 76 69.

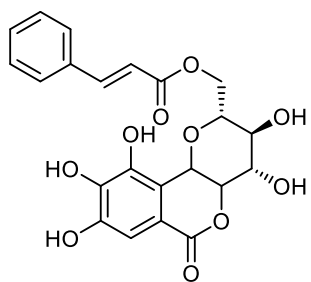

11-O-(E)-cinnamoylnorbergenin (1)

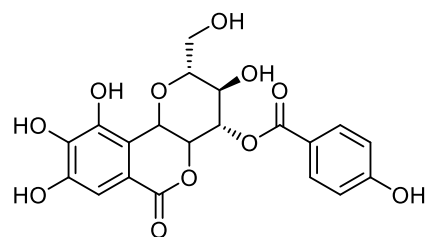

4-O-*p*-hydroxybenzoylnorbergenin (2)

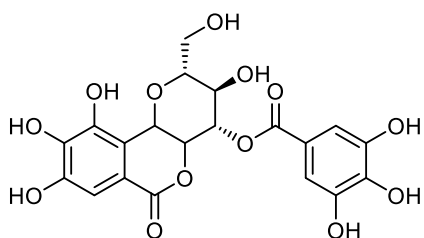

4-O-galloylnorbergenin (3)

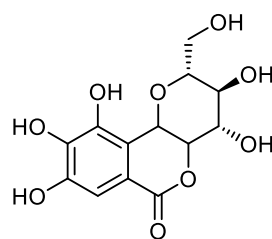

Norbergenin (4)

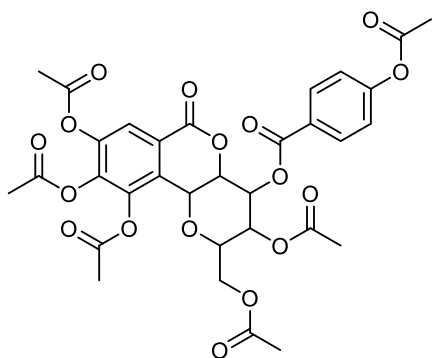

per-acetylated derivative of 4-O-*p*-hydroxybenzoylnorbergenin (5)

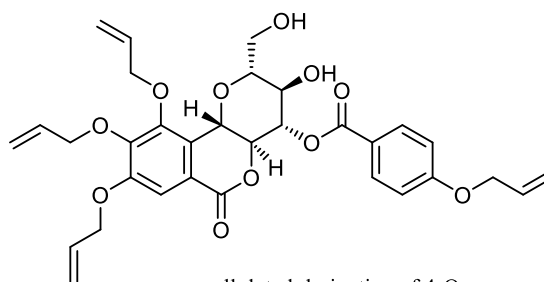

per-allylated derivative of 4-O-*p*-hydroxybenzoylnorbergenin (6)

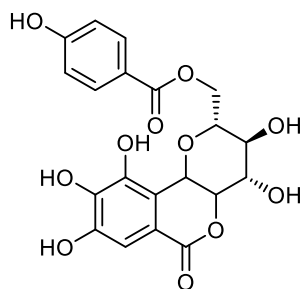

11-O-*p*-hydroxybenzoylnorbergenin (7)

**Figure S1:** Coumarins isolated thus far from *Diospyros gillettii*.

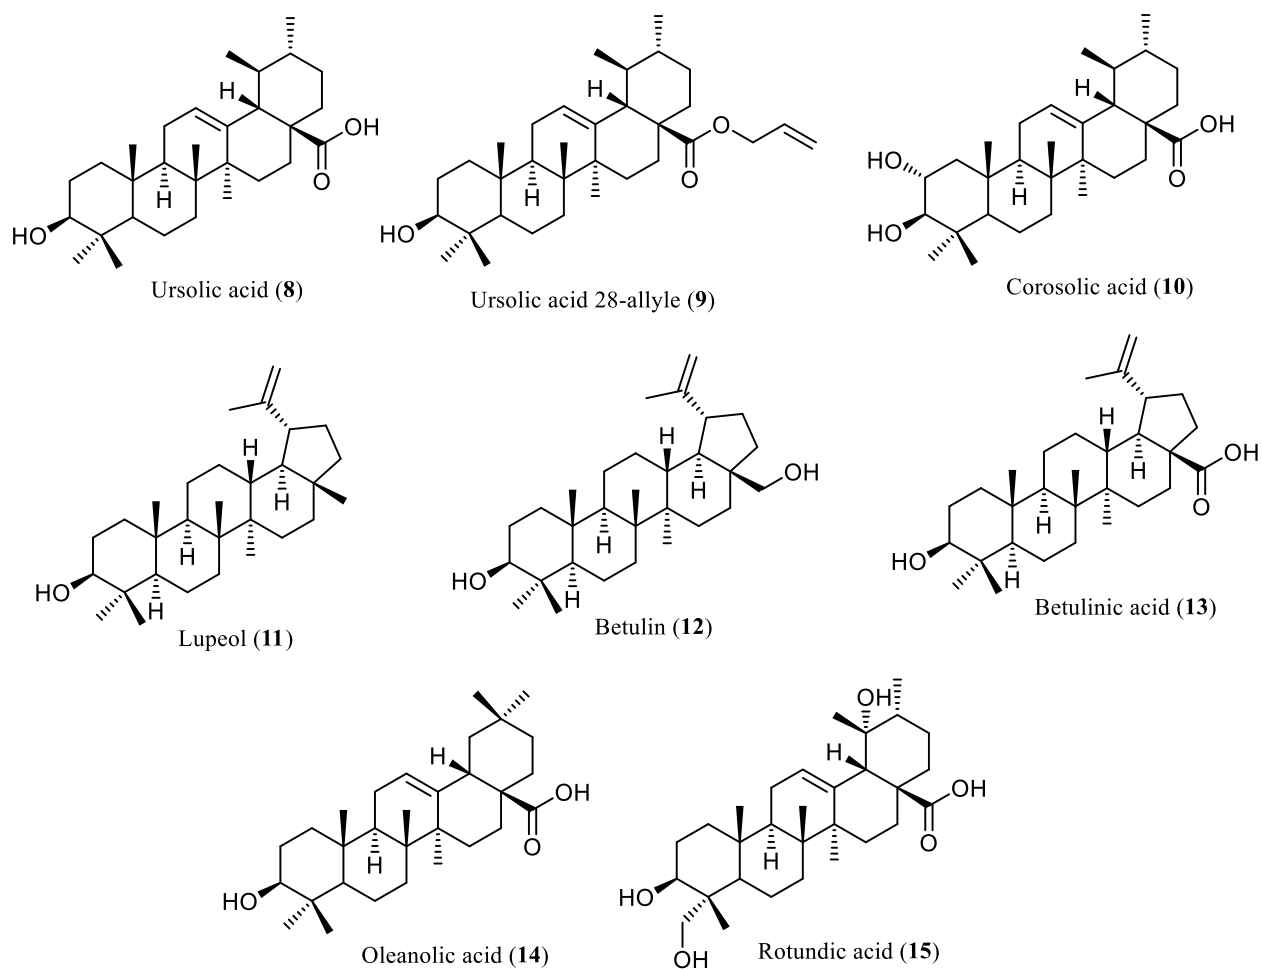

**Figure S2:** Pentacyclic triterpenes (8-10) and triterpenoids (11-15) isolated thus far from *Diospyros gillettii*.
